# Supplementary material for: Analysis of a Commercial Insurance Policy to Deny Coverage for Emergency Department Visits With Nonemergent Diagnoses
Source: PubMed Central journal article supplement (PMC6324426; doi:10.1001/jamanetworkopen.2018.3731), 2018-10-19
Supplement: jamanetwopen-1-e183731-s001.pdf [file jamanetwopen-1-e183731-s001.pdf]

## Supplementary Online Content

Chou S-C, Gondi S, Baker O, Venkatesh AK, Schuur JD. Analysis of a commercial insurance policy to deny coverage for emergency department visits with nonemergent diagnoses. *JAMA Netw Open*. 2018;1(6):e183731. doi:10.1001/jamanetworkopen.2018.3731

**eTable 1.** List of Nonemergent Diagnosis per Missouri Policy

**eTable 2.** List of Nonemergent Diagnosis per Indiana Policy

**eTable 3.** Characteristics of Commercially-Insured Adult ED Patients With "Non-Emergent" ED Discharge Diagnoses, Comparing Missouri vs Indiana Policy

**eTable 4.** Frequencies and Proportions of Top 20 Diagnoses Among Denial Diagnosis Visits

**eTable 5.** Complete list of 329 Reasons for Visit Associated With Denial Diagnosis Visits

**eTable 6.** Denial Symptom Visits as Defined by Primary Symptoms Present in  $\geq 2$  or  $\geq 5$  Denial Diagnosis Visits

**eTable 7.** Denial Symptom Visits, by Data Years

This supplementary material has been provided by the authors to give readers additional information about their work.

**eTable 1. List of Nonemergent Diagnosis per Missouri Policy**

| <b>Diagnosis</b>                                                   | <b>ICD-9 Code</b> |
|--------------------------------------------------------------------|-------------------|
| 1St Deg Burn Multiple Finger                                       | 94413             |
| 1St Deg Burn Wrist                                                 | 94417             |
| Abrasion Head                                                      | 9100              |
| Absence Of Menstruation                                            | 6260              |
| Acute Apical Periodontitis                                         | 5224              |
| Acute Atopic Conjunctivitis                                        | 37205             |
| Acute Ethmoidal Sinusitis                                          | 4612              |
| Acute Follicular Conjunctivitis                                    | 37202             |
| Acute Frontal Sinusitis                                            | 4611              |
| Acute Infection Extern Ear NEC                                     | 38013             |
| Acute Maxillary Sinusitis                                          | 4610              |
| Acute Nonsupprative Otitis Med NOS                                 | 38100             |
| Acute Serous Otitis Media                                          | 38101             |
| Acute Sphenoidal Sinusitis                                         | 4613              |
| Acute Supprative Otitis Media In diseases classified elsewhere     | 38202             |
| Acute Supprative Otitis Media with Spontaneous Rupture of Ear Drum | 38201             |
| Acute Supprative Otitis Media NOS                                  | 38200             |
| Acne NEC                                                           | 7061              |
| Acute Bronchitis                                                   | 4660              |
| Acute Conjunctivitis NOS                                           | 37200             |
| Acute Cystitis                                                     | 5950              |
| Acute Gastritis without Hemorrhage                                 | 53500             |
| Acute Gonococcal Infection Lower Genitourinary Tract               | 0980              |
| Acute Infection Of Pinna                                           | 38011             |
| Acute Laryngitis without Obstruction                               | 46400             |
| Acute Laryngopharyngitis                                           | 4650              |
| Acute Nasopharyngitis                                              | 460               |
| Acute Pharyngitis                                                  | 462               |
| Acute Sinusitis NOS                                                | 4619              |
| Acute Swimmers Ear                                                 | 38012             |
| Acute Tonsillitis                                                  | 463               |
| Acute Uri Multiple Sites NEC                                       | 4658              |
| Allergic Rhinitis Due to Animal Hair & Dander                      | 4772              |
| Allergic Rhinitis Due To Food                                      | 4771              |
| Allergic Rhinitis NEC                                              | 4778              |
| Allergic Rhinitis NOS                                              | 4779              |
| Allergy, Unspecified                                               | 9953              |
| Angular Blepharoconjunctivitis                                     | 37221             |
| Anxiety State NOS                                                  | 30000             |
| Arthropathy NOS-Unspecified                                        | 71690             |
| Back Contusion                                                     | 92231             |
| Backache NOS                                                       | 7245              |
| Blepharoconjunctivit NOS                                           | 37220             |
| Blood Typing Encounter (Begin 2005)                                | V7286             |
| Bronchitis NOS                                                     | 490               |
| Candidal Vulvovaginitis                                            | 1121              |
| Candidiasis Site NOS                                               | 1129              |
| Cellulitis Of Arm                                                  | 6823              |
| Cellulitis Of Buttock                                              | 6825              |
| Cellulitis Of Leg                                                  | 6826              |
| Cellulitis Of Trunk                                                | 6822              |
| Cervicalgia                                                        | 7231              |
| Cervicitis                                                         | 6160              |
| Chalazion                                                          | 3732              |
| Chancroid                                                          | 0990              |
| Chemical Dermatitis NEC                                            | 6924              |

| <b>Diagnosis</b>                            | <b>ICD-9 Code</b> |
|---------------------------------------------|-------------------|
| Chronic Allergic Conjunctivitis NEC         | 37214             |
| Chronic Conjunctivitis NOS                  | 37210             |
| Chronic Ethmoidal Sinusitis                 | 4732              |
| Chronic Fatigue Syndrome (Begin 1998)       | 78071             |
| Chronic Follicular Conjunctivitis           | 37212             |
| Chronic Frontal Sinusitis                   | 4731              |
| Chronic Maxillary Sinusitis                 | 4730              |
| Chronic Serous Otitis Media Simple/NOS      | 38110             |
| Chronic Sphenoidal Sinusitis                | 4733              |
| Chronic Suppurative Otitis Media NOS        | 3823              |
| Chronic Rhinitis                            | 4720              |
| Chronic Sinusitis NEC                       | 4738              |
| Chronic Sinusitis NOS                       | 4739              |
| Condyloma Accuminatum (Begin 1993)          | 07811             |
| Conjunctiva Disorder NOS                    | 3729              |
| Conjunctival Hemorrhage                     | 37272             |
| Conjunctivitis NEC                          | 37239             |
| Conjunctivitis NOS                          | 37230             |
| Constipation, Unspecified                   | 56400             |
| Contact Blepharoconjunctivitis              | 37222             |
| Contusion Face/Scalp/Neck                   | 920               |
| Contusion Of Ankle                          | 92421             |
| Contusion Of Chest Wall                     | 9221              |
| Contusion Of Elbow                          | 92311             |
| Contusion Of Finger                         | 9233              |
| Contusion Of Foot                           | 92420             |
| Contusion Of Forearm                        | 92310             |
| Contusion Of Hand(S)                        | 92320             |
| Contusion Of Knee                           | 92411             |
| Contusion Of Lower Leg                      | 92410             |
| Contusion Of Upper Arm                      | 92303             |
| Contusion Of Wrist                          | 92321             |
| Cough                                       | 7862              |
| Coxsackie Virus Inf NOS                     | 0792              |
| Cramp In Limb                               | 72982             |
| Cystitis NOS                                | 5959              |
| Dental Caries, Unspecified                  | 52100             |
| Dental Disorder NEC                         | 5258              |
| Dental Disorder NOS                         | 5259              |
| Dental Examination                          | V722              |
| Dermatitis Due To Plant                     | 6926              |
| Dermatitis NOS                              | 6929              |
| Dermatographic Urticaria                    | 7083              |
| Dermatophytosis Scalp/Beard                 | 1100              |
| Dermatophytosis Of Body                     | 1105              |
| Dermatophytosis Of Foot                     | 1104              |
| Dermatophytosis Of Groin                    | 1103              |
| Dermatophytosis Site NEC                    | 1108              |
| Dermatophytosis Site NOS                    | 1109              |
| Detergent Dermatitis                        | 6920              |
| Diaper Or Napkin Rash                       | 6910              |
| Diarrhea                                    | 78791             |
| Dis Of Conjunct Due To Viruses (Begin 1993) | 07799             |
| Drug Dermatitis NOS                         | 6930              |
| Dysmenorrhea                                | 6253              |
| Dysuria                                     | 7881              |
| Edema                                       | 7823              |

| <b>Diagnosis</b>                                      | <b>ICD-9 Code</b> |
|-------------------------------------------------------|-------------------|
| Elbow/Forearm/Wrist Injury NOS                        | 9593              |
| Encounter Change Or Remove Surgical Wound Dressing    | V5831             |
| Encounter For Removal Of Sutures                      | V5832             |
| Encounter-Change Or Remove Nonsurgical Wound Dressing | V5830             |
| Enlargement Lymph Nodes                               | 7856              |
| Enthesopathy, Site NOS                                | 72690             |
| Esophageal Reflux                                     | 53081             |
| Exam Ears & Hearing NEC (Begin 2006)                  | V7219             |
| External Hemorrhoid without Complication              | 4553              |
| Eye & Vision Examination                              | V720              |
| Fem Genital Symptoms NOS                              | 6259              |
| Flu W Resp Manifest NEC                               | 4871              |
| Follow-Up Exam NEC                                    | V6759             |
| Follow-Up Exam NOS                                    | V679              |
| Food Poisoning NOS                                    | 0059              |
| Foreign Body Skin                                     | 7094              |
| Foreign Body In Ear                                   | 931               |
| Gastroenteritis                                       | 0088              |
| General Medical Exam NEC                              | V708              |
| Genital Herpes NEC                                    | 05419             |
| Genital Herpes NOS                                    | 05410             |
| Gingivitis/Periodontitis Disorder NOS                 | 5239              |
| Gout NOS                                              | 2749              |
| Group B Streptococcal Carrier                         | V0251             |
| Gastritis/Duodenitis NOS without Hemorrhage           | 53550             |
| Hand- Foot & Mouth Dis                                | 0743              |
| Hand Injury NOS                                       | 9594              |
| Health Exam-Group Survey                              | V705              |
| Hearing Conservation/Treatment (Begin 2007)           | V7212             |
| Hearing Exam-Fail Screen (Begin 2006)                 | V7211             |
| Hepatitis B Carrier                                   | V0261             |
| Hernia NOS                                            | 5539              |
| Herpangina                                            | 0740              |
| Herpes Simplex NOS                                    | 0549              |
| Herpes Zoster NOS                                     | 0539              |
| Herpetic Gingivostomatitis                            | 0542              |
| Hip & Thigh Injury NOS                                | 9596              |
| Hordeolum Externum                                    | 37311             |
| Hypertension                                          | 4019              |
| Hypopotassemia                                        | 2768              |
| Impacted Cerumen                                      | 3804              |
| Impetigo                                              | 684               |
| Infectious Otitis Externa NOS                         | 38010             |
| Infectious Mononucleosis                              | 075               |
| Infestation NOS                                       | 1349              |
| Ingrowing Nail                                        | 7030              |
| Insect Bite NEC-Infected                              | 9195              |
| Insomnia                                              | 78052             |
| Issue Repeat Prescript                                | V681              |
| Joint Pain-Ankle                                      | 71947             |
| Joint Pain-Forearm                                    | 71943             |
| Joint Pain-L/Leg                                      | 71946             |
| Joint Pain-Shoulder                                   | 71941             |
| Joint Pain-Unspecified                                | 71940             |
| Joint Pain-Up/Arm                                     | 71942             |
| Lower Leg Injury NOS                                  | 9597              |
| Lumbago                                               | 7242              |

| <b>Diagnosis</b>                           | <b>ICD-9 Code</b> |
|--------------------------------------------|-------------------|
| Malaise And Fatigue NEC                    | 78079             |
| Male Genital Dis NOS                       | 6089              |
| Med Exam NEC-Admin Purpose                 | V703              |
| Menstrual Disorder                         | 6268              |
| Menstrual Disorder NOS                     | 6269              |
| Mononeuritis Arm NOS                       | 3549              |
| Mononeuritis NOS                           | 3559              |
| Mucopurulent Conjunctivitis NEC            | 37203             |
| Myalgia And Myositis NOS                   | 7291              |
| Nausea Alone                               | 78702             |
| Noise Effect-Ear/NOS                       | 38810             |
| Noninfectious Gastroenteritis NEC          | 5589              |
| Noninflammatory Disorder of Vagina NEC     | 6238              |
| Nonspecific Skin Eruption NEC              | 7821              |
| Nonsuppurative Otitis Media NOS            | 3814              |
| Oil & Grease Dermatitis                    | 6921              |
| Oral Aphthae                               | 5282              |
| Osteoarthritis NOS-L/Leg                   | 71596             |
| Osteoarthritis NOS-Unspecified             | 71590             |
| Otalgia NOS                                | 38870             |
| Other Spec Exam (Begin 1993)               | V7285             |
| Other Spec Pre-Op Exam (Begin 1993)        | V7283             |
| Other Acute Sinusitis                      | 4618              |
| Other Atopic Dermatitis                    | 6918              |
| Other Back Symptoms                        | 7248              |
| Other Diseases Of Nasal Cavity And Sinuses | 47819             |
| Other General Symptoms                     | 78099             |
| Other Injury Of Other Sites Of Trunk       | 95919             |
| Other Psoriasis                            | 6961              |
| Other Spec Viral Warts (Begin 1993)        | 07819             |
| Otitis Media NOS                           | 3829              |
| Otorrhea NOS                               | 38860             |
| Ovarian Cyst                               | 6202              |
| Pain In Limb                               | 7295              |
| Painful Respiration                        | 78652             |
| Pap Smear Confirmation (Begin 2004)        | V7232             |
| Parasitic Conjunctivitis                   | 37215             |
| Patellar Tendinitis                        | 72664             |
| Pediculosis NOS                            | 1329              |
| Periapical Abscess                         | 5225              |
| Phthisis Pubis                             | 1322              |
| Pityriasis Rosea                           | 6963              |
| Pityriasis Versicolor                      | 1110              |
| Plantar Wart (Begin 2008)                  | 07812             |
| Pregnant State- Incidental                 | V222              |
| Pregnancy Test Negative (Begin 2004)       | V7241             |
| Pregnancy Test Unconfirm (Begin 2004)      | V7240             |
| Pregnancy Test-Positive (Begin 2005)       | V7242             |
| Premenstrual Tension                       | 6254              |
| Pre-Op Cardiovascular Exam (Begin 1993)    | V7281             |
| Preop Exam Unspecified                     | V7284             |
| Pre-Op Respiratory Exam (Begin 1993)       | V7282             |
| Pruritic Conditions NEC                    | 6988              |
| Pruritic Disorder NOS                      | 6989              |
| Pseudomembranous Conjunctivitis            | 37204             |
| Pure Hypercholesterolem                    | 2720              |
| Radiological Exam NEC                      | V725              |

| <b>Diagnosis</b>                       | <b>ICD-9 Code</b> |
|----------------------------------------|-------------------|
| Referral-No Exam/Treat                 | V6881             |
| Rhinitis Due To Pollen                 | 4770              |
| Routine Child Health Exam              | V202              |
| Routine Gyn Examination (Begin 2004)   | V7231             |
| Routine Medical Exam                   | V700              |
| Scabies                                | 1330              |
| Sciatica                               | 7243              |
| Screen For Hypertension                | V811              |
| Screen-Diabetes Mellitus               | V771              |
| Screening Eye Cond NEC                 | V802              |
| Screening For Lipoid Disorders         | V7791             |
| Screening For Obesity                  | V778              |
| Screening-Pulmonary Tb                 | V741              |
| Sebaceous Cyst                         | 7062              |
| Sebaceous Gland Dis NOS                | 7069              |
| Seborrheic Dermatitis NOS (Begin 1995) | 69010             |
| Serous Conjunctivitis                  | 37201             |
| Shoulder/Upper Arm Injury NOS          | 9592              |
| Simple Chronic Conjunctivitis          | 37211             |
| Skin Disorder NOS                      | 7099              |
| Skin Disorders NEC                     | 7098              |
| Skin Sensation Disturb                 | 7820              |
| Solar Dermatitis NOS                   | 69270             |
| Solvent Dermatitis                     | 6922              |
| Sprain Elbow/Forearm NOS               | 8419              |
| Sprain Lumbar Region                   | 8472              |
| Sprain NEC                             | 8488              |
| Sprain Of Ankle NOS                    | 84500             |
| Sprain Of Back NOS                     | 8479              |
| Sprain Of Foot NOS                     | 84510             |
| Sprain Of Hand NOS                     | 84210             |
| Sprain Of Wrist NOS                    | 84200             |
| Sprain Shoulder/Arm NOS                | 8409              |
| Sprain Thoracic Region                 | 8471              |
| Strep Sore Throat                      | 0340              |
| Streptococcus Carrier NEC              | V0252             |
| Sunburn                                | 69271             |
| Suppurative Otitis Media NOS           | 3824              |
| Swelling In Head & Neck                | 7842              |
| Swelling Of Limb                       | 72981             |
| Throat Pain                            | 7841              |
| Thrush                                 | 1120              |
| Tinnitus NOS                           | 38830             |
| TMJ Disorders NOS                      | 52460             |
| Topical Food Dermatitis                | 6925              |
| Topical Med Dermatitis                 | 6923              |
| Torticollis NOS                        | 7235              |
| Trichomonal Vaginitis                  | 13101             |
| Trichomoniasis NOS                     | 1319              |
| Urethral Discharge                     | 7887              |
| Urethritis NOS                         | 59780             |
| Urin Tract Infection NOS               | 5990              |
| Urinary Frequency                      | 78841             |
| Urinary Tract Dis NOS                  | 5999              |
| Urticaria NEC                          | 7088              |
| Urticaria NOS                          | 7089              |
| Vaccin For Diphtheria                  | V035              |

| <b>Diagnosis</b>                | <b>ICD-9 Code</b> |
|---------------------------------|-------------------|
| Vaginitis NOS                   | 61610             |
| Varicella Uncomplicated         | 0529              |
| Venereal Disease NOS            | 0999              |
| Vernal Conjunctivitis           | 37213             |
| Viral Exanthemata NOS           | 0579              |
| Viral Hep Carrier NOS           | V0260             |
| Viral Infection NOS             | 07999             |
| Viral Warts Unspec (Begin 1993) | 07810             |
| Vomiting Alone                  | 78703             |

**Abbreviations:** ICD, international classification of disease; NEC, none elsewhere classified; NOS, none otherwise specified

**Note:** ICD-9 code with implied decimal point after 3rd digit from the left.

**eTable 2. List of Nonemergent Diagnosis per Indiana Policy**

| <b>Diagnosis</b>                            | <b>ICD-9 Code</b>            |
|---------------------------------------------|------------------------------|
| Abrasion                                    | 91*0                         |
| Acute Pharyngitis                           | 462                          |
| Acute Serous Otitis Media                   | 38101                        |
| Acne Vulgaris                               | 7061                         |
| Acute Atopic Conjunctivitis Unspecified Eye | 37205                        |
| Acute Bronchitis Due to Spec Organisms      | 4660                         |
| Acute Bronchitis Unspecified                | 4660                         |
| Acute Conjunctivitis                        | 37200                        |
| Acute Laryngitis                            | 46400                        |
| Acute Nasopharyngitis Common Cold           | 460                          |
| Acute Pharyngitis Unspecified               | 462                          |
| Acute Serous Otitis Media Bilateral         | 38101                        |
| Acute Streptococcal Tonsillitis unspecified | 0340                         |
| Acute Tonsillitis Unspecified               | 463                          |
| Acute Up Respiratory Infection Unspecified  | 4658                         |
| Acute Vaginitis                             | 61610                        |
| Allergic Contact Dermatitis                 | 692*                         |
| Allergic Rhinitis                           | 477*                         |
| Allergic Urticaria                          | 708*                         |
| Allergy Unspecified Initial Encounter       | 9953                         |
| Amenorrhea Unspecified                      | 6260                         |
| Anogenital Venereal Warts                   | 07811                        |
| Arthropathy Unspecified                     | 71690                        |
| Atopic Conjunctivitis Eye                   | 37205                        |
| Bullous Impetigo                            | 684                          |
| Candidal Stomatitis                         | 1120                         |
| Cellulitis                                  | 6823 6822 6825 6826 38010    |
| Chalazion Right Upper Eyelid                | 3732                         |
| Chronic Serous Otitis Media                 | 38110                        |
| Conjunctivitis (Pink Eye)                   | 3720* 3721* 3722* 3723* 077* |
| Contact Dermatitis                          | 692*                         |
| Contusion Ankle                             | 92421                        |
| Contusion Upper Arm                         | 92303                        |
| Contusion Ear                               | 920                          |
| Contusion Foot                              | 92420                        |
| Contusion Knee                              | 92411                        |
| Contusion Lower Leg                         | 92410                        |
| Contusion Neck                              | 920                          |
| Contusion Of Nose                           | 920                          |
| Contusion Scalp                             | 920                          |
| Contusion Thigh                             | 92400                        |
| Contusion Toes                              | 9243                         |



| <b>Diagnosis</b>                                                           | <b>ICD-9 Code</b> |
|----------------------------------------------------------------------------|-------------------|
| Cough                                                                      | 7862              |
| Dermatitis Unspecified                                                     | 692*              |
| Dermatophytosis Unspecified                                                | 1109              |
| Disorder Teeth Supporting Structure Unspecified                            | 5258 5259         |
| Encounter Change/Removal Nonsurgical Wound Dressing                        | V5830             |
| Encounter Change/Removal Surg Wound Dressing                               | V5831             |
| Encounter Follow-up Exam After Completion Treatment Not Malignant neoplasm | V6759             |
| Encounter For Issue Repeat Prescription                                    | V681              |
| Encounter For Other General Examination                                    | V708              |
| Encounter Gen Adult Exam without Abnormal Find                             | V700              |
| Encounter Pregnancy Test Result Negative/Positive                          | V724*             |
| Encounter Routine Child Health Exam without Abnormal Finding               | V202              |
| Encounter Exam Bp without Abnormal Find                                    | V7285             |
| Encounter For Immunization                                                 | V035              |
| Encounter For Removal Of Sutures                                           | V5832             |
| Encounter Other Admin Examinations                                         | V703              |
| Encounter Other Spec Special Exams                                         | V725              |
| Encounter Screen For Other Disorder                                        | V778              |
| Enteroviral Vesicular Pharyngitis                                          | 0740              |
| Enthesopathy Unspecified                                                   | 72690             |
| Essential Primary Hypertension                                             | 4019              |
| Fibromyalgia                                                               | 7291              |
| Follicular Disorder Unspecified                                            | 7069              |
| General Skin Eruption Due to Rx Taken Internally                           | 6930              |
| Hordeolum Externum Eyelid                                                  | 37311             |
| Impacted Cerumen                                                           | 3804              |
| Impetigo Unspecified                                                       | 684               |
| Ingrowing Nail                                                             | 7030              |
| Laceration without Fb Knee Or Lower Leg Initial/Recurrent                  | 891*              |
| Low Back Pain                                                              | 7242              |
| Miliaria Rubra                                                             | 7051              |
| Myalgia                                                                    | 7291              |
| Nasal Congestion                                                           | 47819             |
| Nausea                                                                     | 78702             |
| Noninfective Ge & Colitis Unspecified                                      | 5589              |
| Nonsuppurative Otitis Media                                                | 38100             |
| Other Mucopurulent Conjunctivitis Bilateral                                | 37203             |
| Other Skin Change Chron Exposed Nonionizing Rad                            | 69270             |
| Other Specified Condition of Female Genital Organ Menstrual Cycle          | 6259              |
| Other Specified Disorder of Teeth Supporting Structure                     | 5258              |
| Other Specified Noninfective Gastroenteritis & Colitis                     | 5589              |
| Other Specified Noninflammatory Disorder Vagina                            | 6238              |
| Other Allergy Initial Encounter                                            | 9953              |
| Other Fatigue                                                              | 78079             |

| <b>Diagnosis</b>                                    | <b>ICD-9 Code</b>                          |
|-----------------------------------------------------|--------------------------------------------|
| Other Seasonal Allergic Rhinitis                    | 4778                                       |
| Other Spec Soft Tissue Disorders                    | 72981                                      |
| Other Urticaria                                     | 708*                                       |
| Other Viral Warts                                   | 07819                                      |
| Otitis Externa                                      | 38013                                      |
| Otitis Media                                        | 38202                                      |
| Otitis Media Unspecified Bilateral                  | 3829                                       |
| Pain In Extremities (All)                           | 7295 7194*                                 |
| Pain In Throat                                      | 7841                                       |
| Pityriasis Rosea                                    | 6963                                       |
| Plantar Wart                                        | 07812                                      |
| Pregnant State Incidental                           | V222                                       |
| Primary Insomnia                                    | 78052                                      |
| Proc&Tx Not Carried Out Other Reasons               | V64*                                       |
| Pruritus Unspecified                                | 6989                                       |
| Puncture Wound without Foreign Body Leg             | 891*                                       |
| Rash Other Nonspecific Skin Eruption                | 7821                                       |
| Recurrent Oral Aphthae                              | 5282                                       |
| Scabies                                             | 1330                                       |
| Sebaceous Cyst                                      | 7062                                       |
| Serous Conjunctivitis                               | 37201                                      |
| Sprain /Strain Or Unspecified Injury In Extremities | 840* 841* 842* 845* 848*<br>8471 8472 8479 |
| Streptococcal Pharyngitis                           | 0340                                       |
| Sunburn Of First Degree                             | 69271                                      |
| Sunburn Unspecified                                 | 69271                                      |
| Swimmers Ear Rt/Lt/Bilateral                        | 38012                                      |
| Temporomandibular Joint Disorder Unspecified        | 52460                                      |
| Tinea Infections                                    | 110*                                       |
| Unspecified Open Wound Lt/Rt Lower Leg              | 891*                                       |
| Unspecified Viral Inf Skin & Mucus Membrane         | 0579                                       |
| Unspecified Conjunctivitis                          | 37230                                      |
| Unspecified Injury                                  | 959*                                       |
| Unspecified Sprain                                  | 848.9, 848.9                               |
| Upper Respiratory Infection                         | 4658                                       |
| UTI Site Not Specified                              | 5990                                       |
| Vaginitis                                           | 6161*                                      |
| Varicella Without Complication                      | 0529                                       |
| Viral Conjunctivitis Unspecified                    | 07799                                      |
| Viral Infection Unspecified                         | 0088                                       |
| Viral Wart Unspecified                              | 07810                                      |

**Abbreviations:** ICD, international classification of disease

**Note:** Available diagnosis list contains only diagnosis description. Therefore, association with ICD-9 codes were assigned by the authors, with reference to the Missouri policy. ICD-9 code with implied decimal point after 3rd digit from the left. '\*' can be replaced by any digit.

**Table 3. Characteristics of Commercially-Insured Adult ED Patients with "non-Emergent" ED Discharge Diagnoses, Comparing Missouri vs Indiana Policy**

| 2011-2015 National Hospital Ambulatory Medical Care Survey<br>ED Subsample (n=28,304) |                                      |                        |  |                                 |                        |
|---------------------------------------------------------------------------------------|--------------------------------------|------------------------|--|---------------------------------|------------------------|
|                                                                                       | Missouri Policy Visits<br>(n=13,006) |                        |  | Indiana Policy Visits (n=9,528) |                        |
|                                                                                       | Unweighted<br>Count                  | Weighted %<br>(95% CI) |  | Unweighted<br>Count             | Weighted %<br>(95% CI) |
| <b>Demographics</b>                                                                   |                                      |                        |  |                                 |                        |
| <b>Age (category)</b>                                                                 |                                      |                        |  |                                 |                        |
| 15-24 years old                                                                       | 3,009                                | 23.5 (22.5-24.6)       |  | 2,358                           | 24.9 (23.7-26.1)       |
| 25-44 years old                                                                       | 5,394                                | 40.6 (39.5-41.7)       |  | 3,781                           | 38.6 (37.1-40.1)       |
| 45-64 years old                                                                       | 4,603                                | 35.9 (34.8-37.1)       |  | 3,389                           | 36.5 (35.0-38.1)       |
| <b>Female</b>                                                                         | 7,815                                | 60.5 (59.1-61.8)       |  | 5,624                           | 59.9 (58.5-61.3)       |
| <b>Race</b>                                                                           |                                      |                        |  |                                 |                        |
| White, Non-Hispanic                                                                   | 8,908                                | 66.0 (62.9-69.0)       |  | 6,486                           | 65.7 (62.4-68.8)       |
| Black, Non-Hispanic                                                                   | 2,281                                | 20.3 (17.6-23.3)       |  | 1,686                           | 21.0 (18.1-24.4)       |
| Hispanic                                                                              | 1,354                                | 10.8 (9.3-12.4)        |  | 996                             | 10.6 (9.1-12.2)        |
| Other, Non-Hispanic                                                                   | 463                                  | 3.0 (2.4-3.7)          |  | 360                             | 2.7 (2.2-3.4)          |
| <b>Region</b>                                                                         |                                      |                        |  |                                 |                        |
| Northeast                                                                             | 2,614                                | 17.7 (14.1-22.1)       |  | 1,962                           | 18.1 (14.4-22.4)       |
| Midwest                                                                               | 3,198                                | 24.5 (19.4-30.5)       |  | 2,301                           | 24.5 (19.3-30.6)       |
| South                                                                                 | 4,564                                | 38.4 (32.8-44.2)       |  | 3,366                           | 39.0 (33.3-45.0)       |
| West                                                                                  | 2,630                                | 19.4 (15.5-24.0)       |  | 1,899                           | 18.4 (14.6-23.0)       |
| <b>Visit timing</b>                                                                   |                                      |                        |  |                                 |                        |
| <b>Follow-up Visit</b>                                                                | 575                                  | 4.0 (3.5-4.6)          |  | 461                             | 4.3 (3.7-5.0)          |
| <b>Time of day</b>                                                                    |                                      |                        |  |                                 |                        |
| Office Hours                                                                          | 4,657                                | 36.1 (34.7-37.5)       |  | 3,350                           | 34.9 (33.3-36.6)       |
| Evenings <sup>a</sup>                                                                 | 4,723                                | 36.3 (34.8-37.8)       |  | 3,440                           | 36.4 (34.5-38.2)       |
| Weekends <sup>b</sup>                                                                 | 3,626                                | 27.6 (26.5-28.8)       |  | 2,738                           | 28.7 (27.3-30.1)       |
| <b>Was in ED &lt;72hrs prior</b>                                                      | 514                                  | 3.8 (2.8-5.1)          |  | 389                             | 3.8 (2.7-5.3)          |
| <b>Visit severity</b>                                                                 |                                      |                        |  |                                 |                        |
| <b>Triage level</b>                                                                   |                                      |                        |  |                                 |                        |
| Urgent or Emergent                                                                    | 5,174                                | 38.9 (35.8-42.2)       |  | 3,450                           | 35.5 (32.4-38.7)       |
| Semi-Urgent or Nonurgent                                                              | 4,418                                | 33.7 (31.0-36.6)       |  | 3,519                           | 36.6 (33.8-39.4)       |
| Unknown or Triage not Performed                                                       | 3,414                                | 27.3 (23.3-31.8)       |  | 2,559                           | 28.0 (23.7-32.7)       |
| <b>Arrived by ambulance</b>                                                           | 1,075                                | 8.6 (7.9-9.4)          |  | 889                             | 9.3 (8.4-10.2)         |
| <b>Care delivered</b>                                                                 |                                      |                        |  |                                 |                        |
| <b>Any Imaging use</b>                                                                | 6,178                                | 47.8 (45.9-49.6)       |  | 4,648                           | 49.0 (47.2-50.9)       |

|                                              |        |      |             |       |      |             |
|----------------------------------------------|--------|------|-------------|-------|------|-------------|
| CT/MRI                                       | 1,942  | 15.4 | (14.2-16.6) | 1,478 | 15.8 | (14.6-17.2) |
| Ultrasound                                   | 593    | 4.4  | (3.9-5.1)   | 380   | 3.8  | (3.2-4.5)   |
| <b>Total diagnostic services<sup>c</sup></b> |        |      |             |       |      |             |
| 0                                            | 3,519  | 26.0 | (24.4-27.6) | 2,728 | 27.6 | (26.0-29.2) |
| 1                                            | 3,243  | 25.8 | (24.5-27.1) | 2,780 | 29.5 | (28.1-31.0) |
| 2-4                                          | 2,976  | 24.0 | (22.5-25.5) | 2,029 | 22.5 | (21.0-24.0) |
| ≥5                                           | 3,268  | 24.3 | (22.3-26.4) | 1,991 | 20.4 | (18.5-22.4) |
| <b>IV fluids</b>                             | 3,389  | 25.7 | (23.7-27.8) | 2,068 | 21.7 | (19.8-23.8) |
| <b>Disposition</b>                           |        |      |             |       |      |             |
| Admit (observation or inpatient)             | 637    | 4.5  | (3.9-5.3)   | 478   | 4.6  | (3.9-5.4)   |
| Critical Care, OR, or Catheterization Lab    | 114    | 0.8  | (0.6-1.0)   | 108   | 0.9  | (0.7-1.3)   |
| Discharge                                    | 11,578 | 90.1 | (89.0-91.2) | 8,470 | 89.8 | (88.5-90.9) |
| Transfer                                     | 98     | 0.7  | (0.5-0.9)   | 79    | 0.8  | (0.5-1.1)   |
| Left AMA                                     | 93     | 0.6  | (0.5-0.8)   | 75    | 0.7  | (0.5-1.0)   |
| Died upon Arrival or in ED                   | 1      |      |             | 3     |      |             |
| Unknown                                      | 599    | 4.1  | (3.3-5.0)   | 423   | 4.1  | (3.3-5.0)   |

<sup>a</sup> Evenings defined as 5pm Monday through Friday to 8am the next day.

<sup>b</sup> Weekend defined as 8AM on Saturday to 8AM Monday.

<sup>c</sup> Total diagnostic services include any blood or urine testing, electrocardiogram, or any imaging.

**Abbreviations:** ED, Emergency department; CI, confidence interval; IV, intravenous; OR, Operating room; AMA, against medical advice **Note:** Weighted proportion not calculated if cells had fewer than 30 records, which create unstable estimates.

**eTable 4. Frequencies and Proportions of Top 20 Diagnoses among Denial Diagnosis Visits**

| <b>Diagnosis</b>                                               | <b>Denial Diagnosis Visits (n=4,440)</b> |                                        |
|----------------------------------------------------------------|------------------------------------------|----------------------------------------|
|                                                                | <b>Unweighted Count</b>                  | <b>Weighted Proportion (95% CI), %</b> |
| Sprain and strains of ankle, unspecified site                  | 204                                      | 4.2 (3.5-5.1)                          |
| Urinary tract infection, site not specified                    | 185                                      | 4.1 (3.2-5.2)                          |
| Lumbago                                                        | 181                                      | 4.0 (3.2-5.0)                          |
| Pain in limb                                                   | 158                                      | 3.7 (3.0-4.5)                          |
| Acute pharyngitis                                              | 158                                      | 3.4 (2.8-4.2)                          |
| Unspecified disorder of the teeth and supporting structures    | 102                                      | 3.1 (2.2-4.5)                          |
| Acute bronchitis                                               | 112                                      | 2.3 (1.8-3.0)                          |
| Allergy, unspecified                                           | 89                                       | 2.0 (1.5-2.6)                          |
| Essential hypertension, unspecified                            | 83                                       | 1.9 (1.4-2.4)                          |
| Lumbar sprains and strains                                     | 68                                       | 1.7 (1.1-2.6)                          |
| Cough                                                          | 63                                       | 1.5 (1.0-2.2)                          |
| Knee, leg, ankle, and foot injury, other rand unspecified      | 47                                       | 1.5 (0.9-2.4)                          |
| Sprain and strains of shoulder and upper arm, unspecified site | 61                                       | 1.4 (1.0-2.0)                          |
| Pain in joint, shoulder                                        | 60                                       | 1.4 (1.1-2.0)                          |
| Pain in joint, lower leg                                       | 67                                       | 1.3 (1.0-1.8)                          |
| Cellulitis of the leg, except foot                             | 64                                       | 1.3 (0.9-1.8)                          |
| Rash and other nonspecific skin eruption                       | 57                                       | 1.2 (0.9-1.7)                          |
| Sprains and strains of wrist, unspecified site                 | 56                                       | 1.1 (0.8-1.6)                          |
| Streptococcal sore throat                                      | 49                                       | 1.1 (0.8-1.7)                          |

**eTable 5. Complete list of 329 Reasons for Visit Associated with Denial Diagnosis Visits**

| <b>≥5 visits within a CCS category among denial diagnosis visits</b> |
|----------------------------------------------------------------------|
| Abdominal pain, cramps, spasms, NOS                                  |
| Abnormal color of eyes                                               |
| Abnormal pulsations and palpitations                                 |
| Accident, NOS                                                        |
| Allergy, NOS                                                         |
| Animal, human bite                                                   |
| Ankle pain, ache, soreness, discomfort                               |
| Anxiety and nervousness                                              |
| Arm pain, ache, soreness, discomfort                                 |
| Back pain, ache, soreness, discomfort                                |
| Blood in urine (hematuria)                                           |
| Carbuncle, furuncle, boil, cellulitis, abscess, NEC                  |
| Chest pain                                                           |
| Contusions/abrasions/bruises of lower extremity                      |
| Contusions/abrasions/bruises of upper extremity                      |
| Cough                                                                |
| Depression                                                           |
| Diarrhea                                                             |
| Discoloration or abnormal pigmentation                               |
| Earache, pain                                                        |
| Edema                                                                |
| Elbow pain, ache, soreness, discomfort                               |
| Excessive sputum                                                     |
| Eye pain                                                             |
| Facial pain                                                          |
| Fever                                                                |
| Flu                                                                  |
| Foot and toe pain, ache, soreness, discomfort                        |
| Frequency and urgency of urination                                   |
| General weakness                                                     |
| Groin pain                                                           |
| Hand and finger pain, ache, soreness, discomfort                     |
| Head cold, upper respiratory infection (coryza)                      |
| Headache, pain in head                                               |
| Hip pain, ache, soreness, discomfort                                 |
| Hypertension                                                         |
| Infection of skin of leg, foot, or toe                               |
| Injury, Multiple or unspecified                                      |
| Injury, other and unspecified of head, neck, and face                |
| Injury, other and unspecified, of ankle                              |
| Injury, other and unspecified, of arm                                |
| Injury, other and unspecified, of back                               |
| Injury, other and unspecified, of elbow                              |
| Injury, other and unspecified, of foot and toe(s)                    |
| Injury, other and unspecified, of hand and finger(s)                 |
| Injury, other and unspecified, of knee                               |
| Injury, other and unspecified, of leg                                |
| Injury, other and unspecified, of shoulder                           |
| Injury, other and unspecified, of wrist                              |
| Insect bite                                                          |
| Insomnia                                                             |
| Knee pain, ache, soreness, discomfort                                |
| Laceration/cut of facial area                                        |
| Laceration/cut of head and neck area                                 |
| Laceration/cut of lower extremity                                    |

| <b>≥5 visits within a CCS category among denial diagnosis visits</b> |
|----------------------------------------------------------------------|
| Laceration/cut of upper extremity                                    |
| Leg pain, ache, soreness, discomfort                                 |
| Low back pain, ache, soreness, discomfort                            |
| Lower abdominal pain, cramps, spasms,                                |
| Medication, other and unspecified kinds                              |
| Motor vehicle accident, type of injury unspecified                   |
| Nasal congestion                                                     |
| Nausea                                                               |
| Neck pain, ache, soreness, discomfort                                |
| Nosebleed (epistaxis)                                                |
| Other and unspecified symptoms referable to eye, NEC                 |
| Other diseases of the skin                                           |
| Other urinary dysfunctions                                           |
| Pain during pregnancy                                                |
| Pain, unspecified                                                    |
| Painful urination                                                    |
| Pelvic pain                                                          |
| Plugged feeling in ear                                               |
| Rib pain                                                             |
| Shortness of breath                                                  |
| Shoulder pain, ache, soreness, discomfort                            |
| Side pain, flank pain                                                |
| Skin itching                                                         |
| Skin lesion                                                          |
| Skin rash                                                            |
| Sprain and strain of ankle                                           |
| Suture - insertion, removal                                          |
| Swelling of eyes                                                     |
| Swelling of leg                                                      |
| Symptoms of onset of labor                                           |
| Symptoms of teeth and gums                                           |
| Throat pain                                                          |
| Throat soreness                                                      |
| Toothache                                                            |
| Urinary tract infection, NOS                                         |
| Uterine and vaginal bleeding                                         |
| Vertigo - dizziness                                                  |
| Vomiting                                                             |
| Wrist pain, ache, soreness, discomfort                               |

| <b>≥2 Visits within a CCS category among denial diagnosis visits</b> |
|----------------------------------------------------------------------|
| Abdominal mass or tumor                                              |
| Abnormal sensation (paresthesia)                                     |
| Adverse effect of medication                                         |
| Back cramps, contractures, spasms                                    |
| Back symptoms                                                        |
| Blank                                                                |
| Bleeding, Multiple or unspecified sites                              |
| Burn, all degrees, to extremities                                    |
| Chest discomfort, pressure, tightness                                |
| Chills                                                               |
| Contusion, abrasion, bruise, site unspecified                        |
| Contusions/abrasions/bruises of Head, neck, and face                 |
| Convulsions                                                          |
| Cramps, spasms, site unspecified                                     |
| Diagnosed complications of pregnancy and puerperium                  |
| Difficulty in swallowing (dysphagia)                                 |

| <b>≥2 Visits within a CCS category among denial diagnosis visits</b>     |
|--------------------------------------------------------------------------|
| Diminished hearing                                                       |
| Diminished vision                                                        |
| Discharge from eye                                                       |
| Discharge from eye--Pus, matter, white discharge, matted                 |
| Disorders of motor functions                                             |
| Dressing, bandage - application, change                                  |
| Excessively heavy (menorrhagia) menstrual flow                           |
| Eye burning                                                              |
| Eye itching                                                              |
| Foreign body in digestive tract                                          |
| Foreign body in eye                                                      |
| Foreign body in other and unspecified sites                              |
| Fracture/dislocation of arm                                              |
| Fracture/dislocation of hand and fingers                                 |
| General ill feeling                                                      |
| General or unspecified nonviral infection                                |
| Gum pain                                                                 |
| Hand and finger symptoms                                                 |
| Hoarseness, loss of voice                                                |
| Infection of skin of arm, hand, or finger                                |
| Infection, inflammation, swelling of eyelids                             |
| Infections of skin, NOS                                                  |
| Inflammation and swelling of nose                                        |
| Ingestion, inhalation, or exposure to potentially poisonous products     |
| Injury, other and unspecified, of chest and abdomen                      |
| Injury, other and unspecified, of eye                                    |
| Labored or difficult breathing (dyspnea)                                 |
| Laceration/cut, site unspecified                                         |
| Leg symptoms                                                             |
| Loss of feeling (anesthesia)                                             |
| Lump, mass, tumor of back                                                |
| Lump, mass, tumor of foot and toe                                        |
| Medical counseling, NOS                                                  |
| Migraine headache                                                        |
| Mouth pain, burning, soreness                                            |
| Mouth ulcer, sore                                                        |
| Other symptoms/problems relat to psychological and mental disorders, NEC |
| Other and unspecified infectious and parasitic diseases                  |
| Other and unspecified symptoms referable to digestive system             |
| Other endocrine, nutritional, metabolic and immunity diseases            |
| Other musculoskeletal symptoms                                           |
| Other specific therapeutic procedures, NEC (cont.)                       |
| Other symptoms referable to the cardiovascular/lymphatic system, NEC     |
| Other symptoms referable to skin                                         |
| Other symptoms referable to urinary tract                                |
| Pain or soreness of breast                                               |
| Physical examination required for employment                             |
| Pinkeye                                                                  |
| Postoperative visit                                                      |
| Pregnancy, unconfirmed                                                   |
| Problems of pregnancy                                                    |
| Progress visit, NOS                                                      |
| Puncture wound, site unspecified                                         |
| Retention of urine                                                       |
| Shoulder symptoms                                                        |
| Sinus congestion                                                         |
| Sinus inflammation, infection                                            |



| <b>≥2 Visits within a CCS category among denial diagnosis visits</b> |
|----------------------------------------------------------------------|
| Sinus pain and pressure                                              |
| Spotting, bleeding during pregnancy                                  |
| Sprain and strain of wrist                                           |
| Sprain or strain, other and unspecified                              |
| Stomach and abdominal pain, cramps and spasms                        |
| Complications of surgical or medical procedures and treatments       |
| Swelling of ankle                                                    |
| Swelling of arm                                                      |
| Swelling of elbow                                                    |
| Swelling of foot and toe                                             |
| Swelling of hand and finger                                          |
| Swelling of knee                                                     |
| Swelling of skin                                                     |
| Symptoms of fluid abnormalities                                      |
| Throat swelling                                                      |
| Tiredness, exhaustion                                                |
| Tongue inflammation, infection, swelling                             |
| Unspecified joint pain, ache, soreness, discomfort                   |
| Unusual color or odor of urine                                       |
| Upper abdominal pain, cramps, spasms                                 |
| Upper respiratory infections except tonsillitis                      |
| Vaginal discharge                                                    |
| Vaginal pain                                                         |
| Violence, NOS                                                        |
| Wrist symptoms                                                       |

| <b>&lt;2 visits within a CCS category among denial diagnosis visits</b> |
|-------------------------------------------------------------------------|
| Abdominal swelling, NOS                                                 |
| Abnormal involuntary movements                                          |
| Abnormal sensations of the eye                                          |
| Adverse effects, other and unspecified                                  |
| Anal-rectal bleeding                                                    |
| Anemia                                                                  |
| Arm symptoms                                                            |
| Arthritis                                                               |
| Asthma                                                                  |
| Bladder infection                                                       |
| Blindness and half vision                                               |
| Blood in stool (melena)                                                 |
| Breathing problems, NEC                                                 |
| Burn, all degrees, to head, neck, and face                              |
| Burn, all degrees, to trunk area                                        |
| Congestion in chest                                                     |
| Constipation                                                            |
| Coughing up blood                                                       |
| Dental abscess                                                          |
| Diabetes mellitus                                                       |
| Diet and nutritional counseling                                         |
| Discharge from ear                                                      |
| Discharge from eye--bleeding                                            |
| Discharge from eye--Tearing, watering (lacrimation)                     |
| Diseases of the intestine and peritoneum                                |
| Diseases of the thyroid gland                                           |
| Ear infection                                                           |
| Earache, or ear infection                                               |
| Economic problem                                                        |
| Elbow symptoms                                                          |

| <b>&lt;2 visits within a CCS category among denial diagnosis visits</b> |
|-------------------------------------------------------------------------|
| Entry of 'none' or 'no complaint'                                       |
| Excessive sweating, perspiration                                        |
| Fainting (syncope)                                                      |
| Fibrocystic and other diseases of breast                                |
| Foot and toe symptoms                                                   |
| For other findings of blood tests                                       |
| For results of blood glucose tests                                      |
| For results of EKG                                                      |
| Foreign body in respiratory tract                                       |
| Fracture, other and unspecified                                         |
| Fracture/dislocation of ankle                                           |
| Fracture/dislocation of head and face                                   |
| Fracture/dislocation of wrist                                           |
| Functional psychoses                                                    |
| Fungus infections (mycoses)                                             |
| General medical examination                                             |
| General psychiatric or psychological examination (mental health)        |
| Growths or mass of ears                                                 |
| Hand and finger cramps, contractures, spasms                            |
| Hay fever                                                               |
| Hearing dysfunctions                                                    |
| Hip symptoms                                                            |
| Hysterical behavior                                                     |
| Illegible entry                                                         |
| Inadequate data base                                                    |
| Increased heartbeat                                                     |
| Inflammatory diseases of the eye                                        |
| Injections                                                              |
| Injury, other and unspecified, of hip                                   |
| Intermenstrual bleeding (metrorrhagia)                                  |
| Internal prosthetic device                                              |
| Irregular heartbeat                                                     |
| Itching of scalp                                                        |
| Kidney infection                                                        |
| Kidney pain                                                             |
| Laceration/cut of trunk area                                            |
| Late effects of an old injury                                           |
| Leg cramps, contractures, spasms                                        |
| Limitation of movement, stiffness of knee                               |
| Limitation of movement, stiffness of neck                               |
| Limitation of movement, stiffness of arm                                |
| Lump or mass of breast                                                  |
| Lump, mass, tumor of arm                                                |
| Lump, mass, tumor of wrist                                              |
| Navel problems                                                          |
| Nonarticular rheumatism                                                 |
| Organic psychoses                                                       |
| Other and unspecified symptoms referable to the ears, NEC               |
| Other disease of circulatory system                                     |
| Other diseases of female reproductive system                            |
| Other growths of skin                                                   |
| Other special examination                                               |
| Other symptoms of male reproductive system                              |
| Other symptoms of nose                                                  |
| Other symptoms of the heart                                             |
| Other symptoms referable to the female reproductive system              |
| Other symptoms referable to the nervous system                          |

| <b>&lt;2 visits within a CCS category among denial diagnosis visits</b> |
|-------------------------------------------------------------------------|
| Other symptoms referable to the respiratory system                      |
| Other vaginal symptoms                                                  |
| Pain, aching, soreness, tenderness, painful erection of penis           |
| Pain, aching, tenderness of the scrotum and testes                      |
| Pain, specified site not referable to a specific body system            |
| Painful menstruation (dysmenorrhea)                                     |
| Pelvic pressure or dropping sensation                                   |
| Pelvic symptoms                                                         |
| Penile discharge                                                        |
| Physical examination for extracurricular activities                     |
| Police involvement in outpatient visit circumstances                    |
| Prenatal examination, routine                                           |
| Preoperative visit for specified/unspecified types of surgery           |
| Problems, complaints, NEC                                               |
| Prophylactic inoculations                                               |
| Psoriasis                                                               |
| Puncture wound of lower extremity                                       |
| Puncture wound of upper extremity                                       |
| Rape                                                                    |
| Skin irritations, NEC                                                   |
| Skin pain                                                               |
| Sprain and strain of back                                               |
| Sprain and strain of knee                                               |
| Streptococcal infection                                                 |
| Sunburn, windburn                                                       |
| Swelling of neck                                                        |
| Swelling, inflammation of the scrotum and testes                        |
| Swollen or enlarged glands                                              |
| Symptoms of penis                                                       |
| Symptoms of unspecified joints                                          |
| Symptoms of unspecified muscles                                         |
| Symptoms referable to lips                                              |
| Symptoms referable to mouth                                             |
| Symptoms referable to nails                                             |
| Symptoms referable to throat                                            |
| Symptoms referable to tongue                                            |
| Tongue pain                                                             |
| Tonsillitis                                                             |
| Unspecified muscle cramps, contractures, spasms                         |
| Unspecified muscle pain, ache, soreness, discomfort                     |
| Urinary tract instrumentation and catheterization                       |
| Vaginal itching, burning                                                |
| Vasomotor symptoms-hot flashes                                          |
| Viral diseases                                                          |
| Vision dysfunctions                                                     |
| Vulvar disorders                                                        |
| Weakness (neurologic)                                                   |
| Weakness of knee                                                        |
| Wheezing                                                                |
| Worker's Compensation examination                                       |

Abbreviations: NEC, none elsewhere classified; NOS, none otherwise specified.

**eTable 6. Denial Symptom Visits as Defined by Primary Symptoms Present in  $\geq 2$  or  $\geq 5$  Denial Diagnosis Visits**

2011-2015 National Hospital Ambulatory Medical Care Survey - ED Subsample

|                                  | Denial Symptom Visits $\geq 2$ visits<br>(n=24,882) |                        | Denial Symptom Visits $\geq 5$ Visits<br>(n=21,013) |                        |
|----------------------------------|-----------------------------------------------------|------------------------|-----------------------------------------------------|------------------------|
|                                  | Unweighted Count                                    | Weighted %<br>(95% CI) | Unweighted Count                                    | Weighted %<br>(95% CI) |
| <b>Demographics</b>              |                                                     |                        |                                                     |                        |
| <b>Age (category)</b>            |                                                     |                        |                                                     |                        |
| 15-24 years old                  | 5,490                                               | 22.1 (21.3-22.9)       | 4,620                                               | 22.1 (21.2-23.1)       |
| 25-44 years old                  | 10,053                                              | 40.1 (39.2-40.9)       | 8,479                                               | 40.0 (39.1-41.0)       |
| 45-64 years old                  | 9,339                                               | 37.8 (37.0-38.7)       | 7,914                                               | 37.8 (36.9-38.8)       |
| <b>Female</b>                    | 14,362                                              | 57.9 (56.9-58.9)       | 12,037                                              | 57.7 (56.7-58.7)       |
| <b>Race</b>                      |                                                     |                        |                                                     |                        |
| White, Non-Hispanic              | 17,483                                              | 68.7 (66.2-71.1)       | 14,706                                              | 68.3 (65.9-70.7)       |
| Black, Non-Hispanic              | 3,837                                               | 17.6 (15.4-20.1)       | 3,272                                               | 17.8 (15.5-20.3)       |
| Hispanic                         | 2,647                                               | 10.8 (9.4-12.3)        | 2,256                                               | 11.1 (9.6-12.5)        |
| Other, Non-Hispanic              | 915                                                 | 3.0 (2.4-3.6)          | 779                                                 | 2.9 (2.4-3.5)          |
| <b>Region</b>                    |                                                     |                        |                                                     |                        |
| Northeast                        | 5,173                                               | 18.8 (15.0-23.4)       | 4,344                                               | 18.7 (15.0-23.1)       |
| Midwest                          | 6,320                                               | 25.1 (20.1-30.8)       | 5,342                                               | 25.3 (20.2-31.1)       |
| South                            | 8,164                                               | 36.1 (30.9-41.6)       | 6,944                                               | 36.1 (30.8-41.5)       |
| West                             | 5,225                                               | 20.0 (16.1-24.6)       | 4,383                                               | 20.1 (16.1-24.7)       |
| <b>Visit timing</b>              |                                                     |                        |                                                     |                        |
| <b>Follow-up Visit</b>           | 1,098                                               | 4.2 (3.7-4.7)          | 893                                                 | 4.0 (3.6-4.6)          |
| <b>Time of day</b>               |                                                     |                        |                                                     |                        |
| Office Hours                     | 8,700                                               | 34.7 (33.8-35.6)       | 7,415                                               | 35.0 (34.1-36.0)       |
| Evenings <sup>a</sup>            | 9,236                                               | 37.4 (36.5-38.4)       | 7,746                                               | 37.3 (36.3-38.3)       |
| Weekends <sup>b</sup>            | 6,946                                               | 27.9 (27.1-28.7)       | 5,852                                               | 27.7 (26.9-28.5)       |
| <b>Was in ED &lt;72hrs prior</b> | 996                                                 | 3.8 (2.9-5.0)          | 830                                                 | 3.8 (2.8-5.0)          |
| <b>Visit severity</b>            |                                                     |                        |                                                     |                        |
| <b>Triage level</b>              |                                                     |                        |                                                     |                        |
| Immediate                        | 10,870                                              | 43.2 (40.2-46.4)       | 9,045                                               | 42.5 (39.4-45.7)       |
| Emergent                         | 7,360                                               | 28.9 (26.8-31.2)       | 6,413                                               | 29.8 (27.6-32.2)       |
| Unknown or Triage not Performed  | 6,652                                               | 27.8 (24.1-31.9)       | 5,555                                               | 27.7 (23.8-31.9)       |
| <b>Arrived by ambulance</b>      | 2,480                                               | 10.3 (9.8-10.9)        | 1,999                                               | 9.9 (9.3-10.5)         |
| <b>Care delivered</b>            |                                                     |                        |                                                     |                        |

|                                              |        |          |             |        |          |             |
|----------------------------------------------|--------|----------|-------------|--------|----------|-------------|
| <b>Any Imaging use</b>                       | 12,778 | 52.<br>0 | (50.4-53.6) | 11,187 | 53.<br>6 | (52.0-55.2) |
| CT/MRI                                       | 4,790  | 19.<br>6 | (18.4-20.8) | 4,145  | 20       | (18.8-21.3) |
| Ultrasound                                   | 1,268  | 5.0      | (4.5-5.5)   | 1,012  | 4.7      | (4.2-5.2)   |
| <b>Total diagnostic services<sup>c</sup></b> |        |          |             |        |          |             |
| 0                                            | 6,437  | 24.<br>9 | (23.6-26.2) | 5,276  | 24.<br>4 | (23.1-25.7) |
| 1                                            | 5,669  | 23.<br>2 | (22.1-24.2) | 5,022  | 24.<br>2 | (23.1-25.3) |
| 2-4                                          | 5,517  | 23.<br>5 | (22.3-24.8) | 4,628  | 23.<br>4 | (22.0-24.7) |
| ≥5                                           | 7,259  | 28.<br>4 | (26.5-30.4) | 6,087  | 28.<br>1 | (26.2-30.1) |
| <b>IV fluids</b>                             | 7,537  | 30.<br>1 | (28.0-32.2) | 6,351  | 29.<br>9 | (27.9-32.0) |
| <b>Disposition</b>                           |        |          |             |        |          |             |
| Admit (observation or inpatient)             | 2,189  | 8.2      | (7.3-9.2)   | 1,804  | 7.9      | (7.1-8.9)   |
| Critical Care, OR, or Catheterization Lab    | 564    | 2.0      | (1.7-2.4)   | 466    | 2.1      | (1.7-2.4)   |
| Discharge                                    | 20,874 | 85.<br>2 | (83.9-86.4) | 17,727 | 85.<br>8 | (84.5-87.0) |
| Transfer                                     | 408    | 1.4      | (1.2-1.7)   | 302    | 1.3      | (1.0-1.5)   |
| Left AMA                                     | 372    | 1.5      | (1.3-1.7)   | 303    | 1.4      | (1.2-1.7)   |
| Died upon Arrival or in ED                   | 5      |          |             | 3      |          |             |
| Unknown                                      | 1,034  | 3.7      | (3.1-4.4)   | 874    | 3.6      | (3.0-4.3)   |

<sup>a</sup> Evenings defined as 5pm Monday through Friday to 8am the next day.

<sup>b</sup> Weekend defined as 8AM on Saturday to 8AM Monday.

<sup>c</sup> Total diagnostic services include any blood or urine testing, electrocardiogram, or any imaging.

**Abbreviations:** ED, Emergency department; CI, confidence interval; IV, intravenous; OR, Operating room; AMA, against medical advice **Note:** Weighted proportion not calculated if cells had fewer than 30 records, which create unstable estimates.

**eTable 7. Denial Symptom Visits, By Data Years**

| National Hospital Ambulatory Medical Care Survey - ED Subsample |                         |                        |  |                        |                        |  |
|-----------------------------------------------------------------|-------------------------|------------------------|--|------------------------|------------------------|--|
| Data Year                                                       | 2011-2015<br>(n=24,882) |                        |  | 2014-2015<br>(n=7,878) |                        |  |
|                                                                 | Unweighted Count        | Weighted %<br>(95% CI) |  | Unweighted Count       | Weighted %<br>(95% CI) |  |
| <b>Demographics</b>                                             |                         |                        |  |                        |                        |  |
| <b>age (category)</b>                                           |                         |                        |  |                        |                        |  |
| 15-24 years old                                                 | 5,490                   | 22.1 (21.3-22.9)       |  | 1,718                  | 21.8 (20.4-23.3)       |  |
| 25-44 years old                                                 | 10,053                  | 40.1 (39.2-40.9)       |  | 3,249                  | 41.3 (39.7-42.9)       |  |
| 45-64 years old                                                 | 9,339                   | 37.8 (37.0-38.7)       |  | 2,911                  | 36.9 (35.3-38.4)       |  |
| <b>Female</b>                                                   | 14,362                  | 57.9 (56.9-58.9)       |  | 4,720                  | 60.2 (58.5-61.9)       |  |
| <b>Race</b>                                                     |                         |                        |  |                        |                        |  |
| White, Non-Hispanic                                             | 17,483                  | 68.7 (66.2-71.1)       |  | 5,461                  | 66.8 (62.3-71.0)       |  |
| Black, Non-Hispanic                                             | 3,837                   | 17.6 (15.4-20.1)       |  | 1,323                  | 19.9 (16.0-24.4)       |  |
| Hispanic                                                        | 2,647                   | 10.8 (9.4-12.3)        |  | 848                    | 10.6 (8.6-13.0)        |  |
| Other, Non-Hispanic                                             | 915                     | 3.0 (2.4-3.6)          |  | 246                    | 2.7 (2.0-3.6)          |  |
| <b>Region</b>                                                   |                         |                        |  |                        |                        |  |
| Northeast                                                       | 5,173                   | 18.8 (15.0-23.4)       |  | 1,562                  | 18.1 (13.5-23.9)       |  |
| Midwest                                                         | 6,320                   | 25.1 (20.1-30.8)       |  | 2,055                  | 29.5 (22.3-37.9)       |  |
| South                                                           | 8,164                   | 36.1 (30.9-41.6)       |  | 2,708                  | 35.9 (29.8-42.4)       |  |
| West                                                            | 5,225                   | 20.0 (16.1-24.6)       |  | 1,553                  | 16.5 (12.6-21.4)       |  |
| <b>Visit timing</b>                                             |                         |                        |  |                        |                        |  |
| <b>Follow-up Visit</b>                                          | 1,098                   | 4.2 (3.7-4.7)          |  | 357                    | 4.4 (3.7-5.3)          |  |
| <b>Time of day</b>                                              |                         |                        |  |                        |                        |  |
| Office Hours                                                    | 8,700                   | 34.7 (33.8-35.6)       |  | 2,760                  | 35.7 (34.3-37.1)       |  |
| Evenings <sup>a</sup>                                           | 9,236                   | 37.4 (36.5-38.4)       |  | 2,977                  | 36.5 (34.7-38.3)       |  |
| Weekends <sup>b</sup>                                           | 6,946                   | 27.9 (27.1-28.7)       |  | 2,141                  | 27.8 (26.5-29.1)       |  |
| <b>Was in ED &lt;72hrs prior</b>                                | 996                     | 3.8 (2.9-5.0)          |  | 356                    | 5.0 (3.0-8.2)          |  |
| <b>Visit severity</b>                                           |                         |                        |  |                        |                        |  |
| <b>Triage level</b>                                             |                         |                        |  |                        |                        |  |
| Immediate                                                       | 10,870                  | 43.2 (40.2-46.4)       |  | 3,187                  | 39.2 (33.8-44.9)       |  |
| Emergent                                                        | 7,360                   | 28.9 (26.8-31.2)       |  | 2,379                  | 28.6 (24.5-33.0)       |  |
| Unknown or Triage not Performed                                 | 6,652                   | 27.8 (24.1-31.9)       |  | 2,312                  | 32.2 (25.1-40.3)       |  |
| <b>Arrived by ambulance</b>                                     | 2,480                   | 10.3 (9.8-10.9)        |  | 714                    | 9.5 (8.7-10.5)         |  |
| <b>Care delivered</b>                                           |                         |                        |  |                        |                        |  |
| <b>Any Imaging use</b>                                          | 12,778                  | 52.0 (50.4-53.6)       |  | 4,066                  | 52.3 (49.6-55.0)       |  |
| CT/MRI                                                          | 4,790                   | 19.6 (18.4-20.8)       |  | 1,519                  | 19.4 (17.4-21.6)       |  |
| Ultrasound                                                      | 1,268                   | 5.0 (4.5-5.5)          |  | 425                    | 5.7 (4.9-6.6)          |  |

**Total diagnostic services<sup>c</sup>**

|                  |       |          |             |       |      |             |
|------------------|-------|----------|-------------|-------|------|-------------|
| 0                | 6,437 | 24.<br>9 | (23.6-26.2) | 1,989 | 24.2 | (22.1-26.4) |
| 1                | 5,669 | 23.<br>2 | (22.1-24.2) | 1,778 | 23.0 | (21.1-25.0) |
| 2-4              | 5,517 | 23.<br>5 | (22.3-24.8) | 1,862 | 24.6 | (22.4-26.9) |
| ≥5               | 7,259 | 28.<br>4 | (26.5-30.4) | 2,249 | 28.2 | (25.1-31.6) |
| <b>IV fluids</b> | 7,537 | 30.<br>1 | (28.0-32.2) | 2,289 | 28.1 | (24.4-32.1) |

**Disposition**

|                                           |        |          |             |       |      |             |
|-------------------------------------------|--------|----------|-------------|-------|------|-------------|
| Admit (observation or inpatient)          | 2,189  | 8.2      | (7.3-9.2)   | 585   | 6.9  | (5.8-8.3)   |
| Critical Care, OR, or Catheterization Lab | 564    | 2.0      | (1.7-2.4)   | 143   | 1.7  | (1.3-2.2)   |
| Discharge                                 | 20,874 | 85.<br>2 | (83.9-86.4) | 6,898 | 89.3 | (87.7-90.7) |
| Transfer                                  | 408    | 1.4      | (1.2-1.7)   | 110   | 0.9  | (0.7-1.3)   |
| Left AMA                                  | 372    | 1.5      | (1.3-1.7)   | 105   | 1.2  | (0.9-1.5)   |
| Died upon Arrival or in ED                | 5      |          |             | 0     |      |             |
| Unknown                                   | 1,034  | 3.7      | (3.1-4.4)   | 180   | 1.7  | (1.2-2.3)   |

<sup>a</sup> Evenings defined as 5pm Monday through Friday to 8am the next day.

<sup>b</sup> Weekend defined as 8AM on Saturday to 8AM Monday.

<sup>c</sup> Total diagnostic services include any blood or urine testing, electrocardiogram, or any imaging.

**Abbreviations:** ED, Emergency department; CI, confidence interval; IV, intravenous; OR, Operating room; AMA, against medical advice **Note:** Weighted proportion not calculated if cells had fewer than 30 records, which create unstable estimates.
